# Supplementary material for: Microbial functional genes enriched in the Xiangjiang River sediments with heavy metal contamination
Source: PubMed Central journal article supplement (PMC4976514; doi:10.1186/s12866-016-0800-x), 2016-08-08
Supplement: 12866_2016_800_MOESM1_ESM.pdf [file 12866_2016_800_MOESM1_ESM.pdf]

Table S1. Numbers of detected genes involved in metal homeostasis and dsr genes.

| Gene category    | Functional gene | A1   | A2   | A3   | B1   | B2   | B3   | C1   | C2   | C3   |
|------------------|-----------------|------|------|------|------|------|------|------|------|------|
| Arsenic          | aoxb            | 150  | 140  | 148  | 134  | 130  | 131  | 118  | 114  | 112  |
| Arsenic          | arra            | 53   | 51   | 51   | 45   | 46   | 46   | 42   | 41   | 43   |
| Arsenic          | arsc            | 476  | 470  | 475  | 436  | 431  | 431  | 373  | 366  | 367  |
| Arsenic          | arism           | 46   | 46   | 46   | 41   | 41   | 42   | 37   | 36   | 36   |
| Arsenic          | arxa            | 3    | 3    | 3    | 3    | 3    | 3    | 2    | 2    | 2    |
| Arsenic          | total           | 728  | 722  | 723  | 659  | 641  | 653  | 572  | 559  | 560  |
| Chromium         | chrr            | 25   | 25   | 25   | 23   | 23   | 23   | 21   | 20   | 20   |
| Copper           | cueo            | 25   | 23   | 23   | 19   | 19   | 20   | 18   | 17   | 17   |
| Mercury          | mer             | 412  | 411  | 411  | 367  | 362  | 366  | 329  | 310  | 324  |
| Mercury          | merg            | 1    | 1    | 1    | 1    | 1    | 1    | 1    | 1    | 1    |
| Mercury          | metc            | 13   | 13   | 13   | 13   | 11   | 12   | 10   | 10   | 10   |
| Mercury          | merb            | 62   | 62   | 61   | 53   | 56   | 57   | 51   | 50   | 50   |
| Mercury          | total           | 488  | 482  | 486  | 434  | 437  | 436  | 391  | 381  | 385  |
| Tellurium        | tehb            | 107  | 101  | 105  | 92   | 90   | 92   | 71   | 71   | 69   |
| Tellurium        | terc            | 458  | 452  | 456  | 402  | 396  | 399  | 354  | 349  | 347  |
| Tellurium        | total           | 565  | 557  | 561  | 494  | 486  | 491  | 425  | 412  | 416  |
| Total            |                 | 1831 | 1793 | 1818 | 1629 | 1595 | 1623 | 1427 | 1379 | 1398 |
| Sulfur reduction | dsrA            | 377  | 373  | 376  | 344  | 340  | 343  | 300  | 294  | 292  |
| Sulfur reduction | dsrB            | 528  | 516  | 517  | 466  | 455  | 458  | 394  | 385  | 382  |
| Sulfur reduction | total           | 905  | 889  | 893  | 810  | 795  | 801  | 694  | 679  | 674  |
