# Supplementary material for: Microbial functional genes enriched in the Xiangjiang River sediments with heavy metal contamination
Source: PubMed Central journal article supplement (PMC4976514; doi:10.1186/s12866-016-0800-x), 2016-08-08

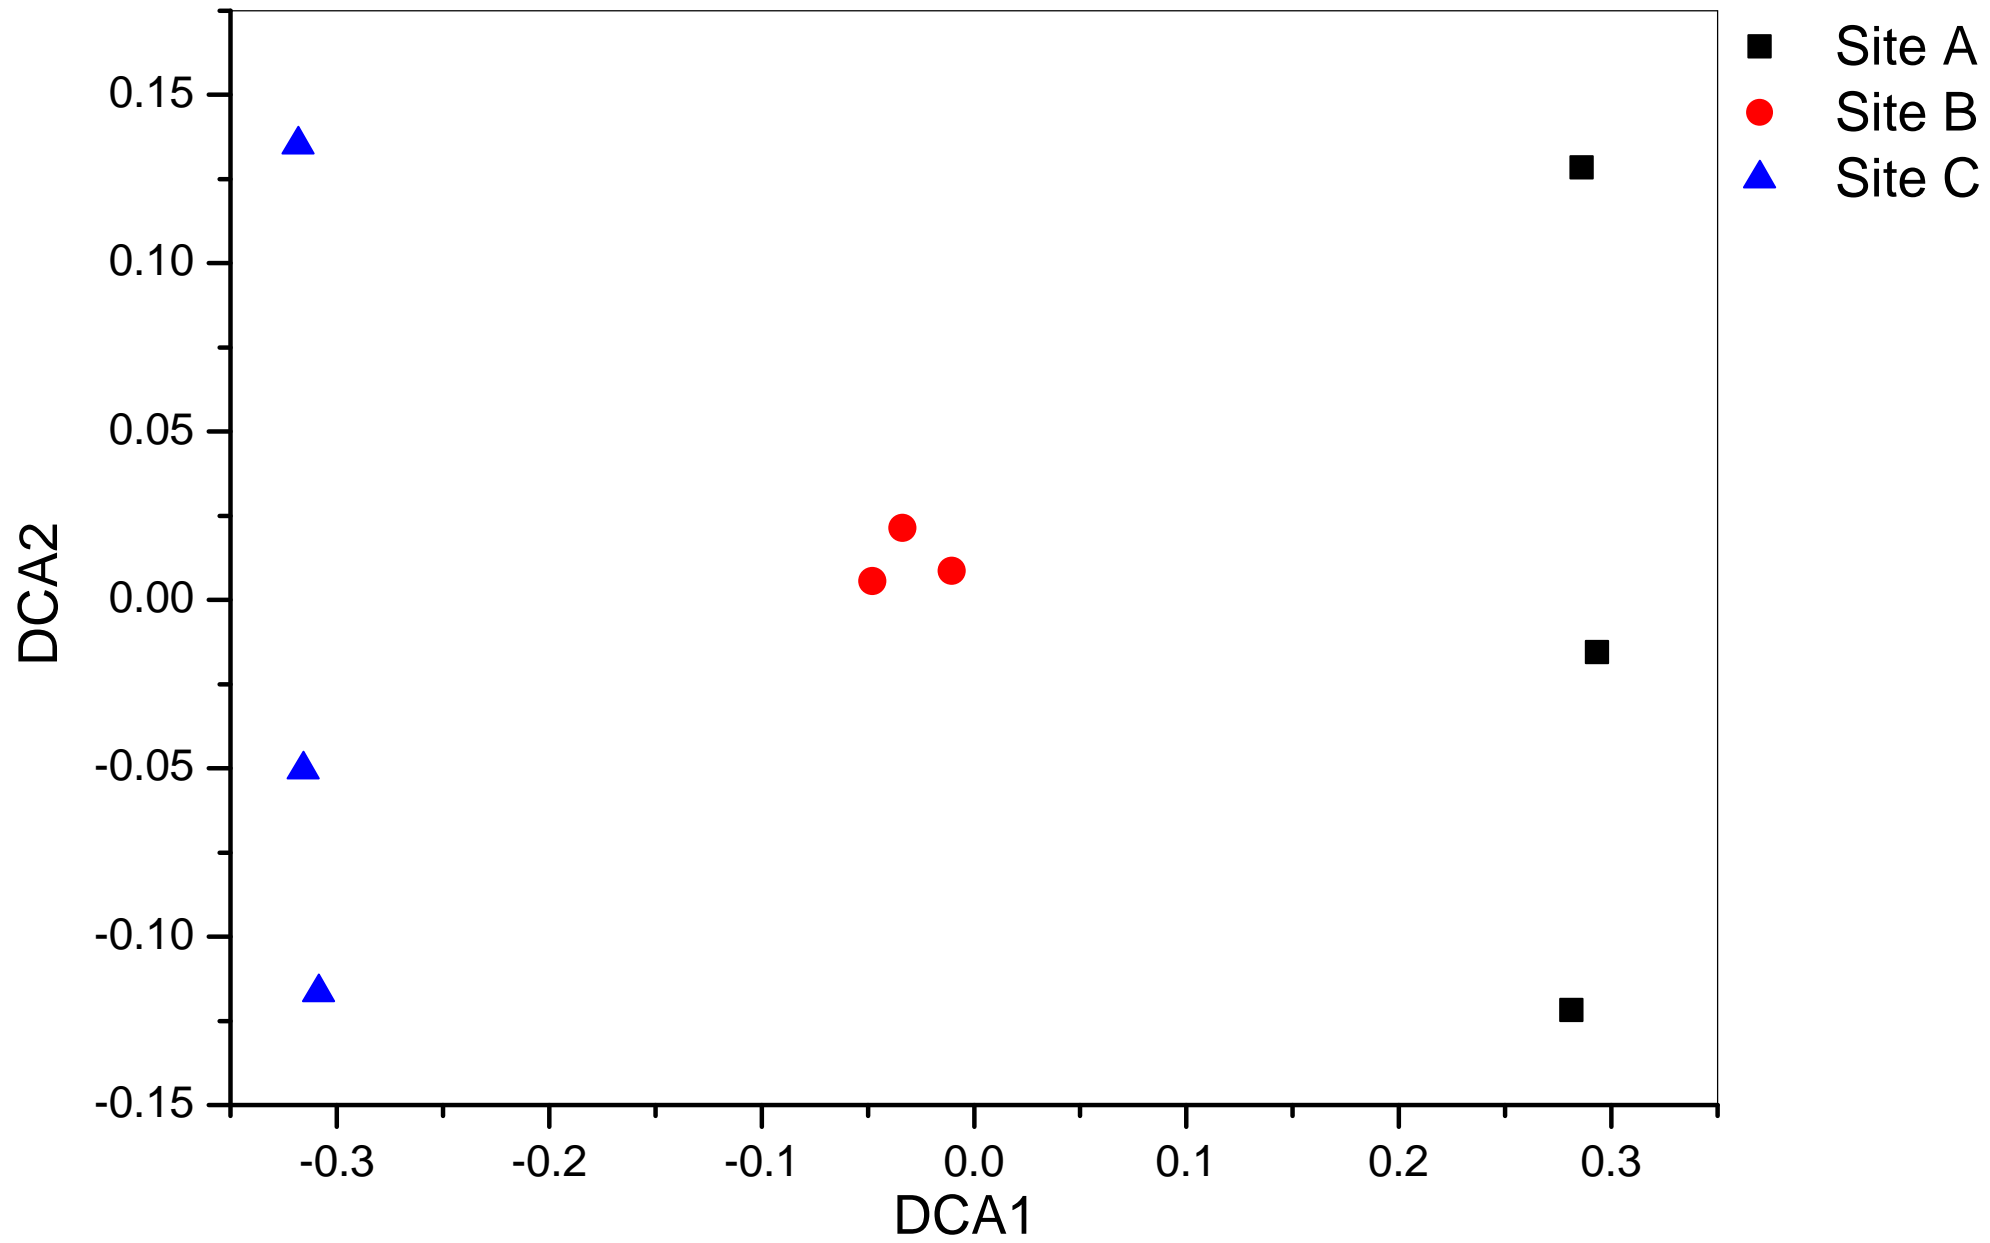

Supplement: 12866_2016_800_MOESM2_ESM.pdf [file 12866_2016_800_MOESM2_ESM.pdf]
